# Supplementary material for: Mycovirus Fusarium oxysporum f. sp. dianthi Virus 1 Decreases the Colonizing Efficiency of Its Fungal Host
Source: PubMed Central journal article supplement (PMC6422920; doi:10.3389/fcimb.2019.00051), 2019-03-12
Supplement: Data_Sheet_2.pdf [file Data_Sheet_2.pdf]

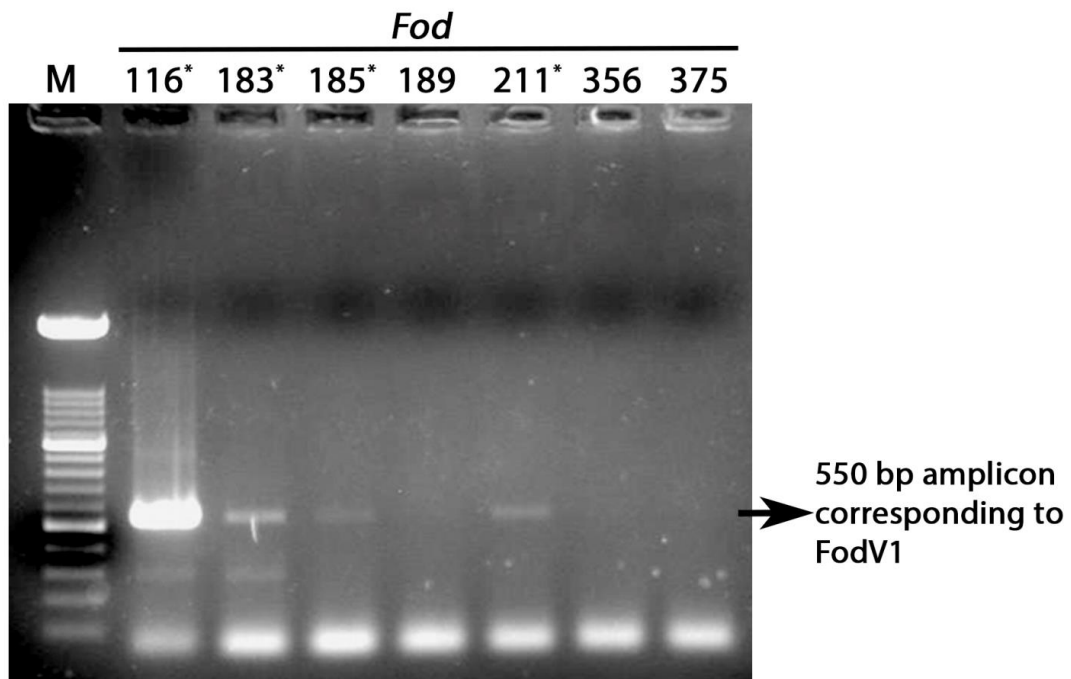

**SUPPLEMENTARY IMAGE TO FIGURE 7 | Analysis of isolates of *Fusarium oxysporum* f. sp. *dianthi* (*Fod*) to identify infections with FodV1.** Complete image corresponding to agarose gel electrophoresis of the RT-PCR products obtained using dsRNA extracts and specific primers for the RdRp segment of FodV1. \* Isolates infected with mycovirus FodV1. **M**, molecular weight marker XIV (Roche Diagnostics).
