# Supplementary material for: Mycovirus Fusarium oxysporum f. sp. dianthi Virus 1 Decreases the Colonizing Efficiency of Its Fungal Host
Source: Front Cell Infect Microbiol. 2019 Mar 12;9:51. doi: 10.3389/fcimb.2019.00051 (PMC6422920; doi:10.3389/fcimb.2019.00051)
Supplement: Supplementary file 1 [file Table_1.docx]

| **SUPPLEMENTARY TABLE 1 | Percentage of the standardized area under the disease progress curve (sAUDPC)**(y) | | | | |
| --- | --- | --- | --- | --- |
| Isolates inoculated(x) | Carnation cultivars | | | |
| Candela | | | Pink Bijou |
| *Fod* 77-wt | 0.84a | | 0.99a | |
| *Fod* 77-GFP | 0.87a | 0.96a | | |

(y)Means followed by the same letter are not significantly different according to Fisher’s

Least significant difference (LSD) (*P* ≤0.05).

(x)*Fod* 77-wt: wild type strain *Fod* 77.

*Fod* 77-GFP: *Fod* 77 strain expressing the GFP fluorescent protein.
